# Supplementary material
Source: MDPI journal article supplement (https://www.mdpi.com/2673-8112/1/1/24)
Supplement: s1 [file s1]

[illegible]

|                            |           |           |       |           |       |           |           |       |           |       |
|----------------------------|-----------|-----------|-------|-----------|-------|-----------|-----------|-------|-----------|-------|
| Charlson comorbidity index |           |           | 0.944 |           | 0.831 |           |           | 0.724 |           | 0.994 |
| 0                          | 151 (53%) | 187 (55%) |       | 140 (59%) |       | 127 (51%) | 186 (55%) |       | 178 (55%) |       |
| 1                          | 51 (18%)  | 56 (17%)  |       | 37 (16%)  |       | 41 (16%)  | 59 (17%)  |       | 55 (17%)  |       |
| 2                          | 52 (18%)  | 59 (17%)  |       | 36 (15%)  |       | 51 (20%)  | 60 (18%)  |       | 57 (18%)  |       |
| 3+                         | 32 (11%)  | 37 (11%)  |       | 25 (11%)  |       | 30 (12%)  | 36 (11%)  |       | 32 (10%)  |       |
|                            |           |           |       |           |       |           |           |       |           |       |
| Freiburg comorbidity index |           |           | 0.674 |           | 0.551 |           |           | 0.977 |           | 0.702 |
| 0                          | 223 (78%) | 268 (79%) |       | 196 (82%) |       | 197 (79%) | 272 (80%) |       | 257 (80%) |       |
| 1                          | 56 (20%)  | 66 (19%)  |       | 40 (17%)  |       | 47 (19%)  | 62 (18%)  |       | 61 (19%)  |       |
| 2                          | 7 (2%)    | 5 (1%)    |       | 2 (1%)    |       | 5 (2%)    | 7 (2%)    |       | 4 (1%)    |       |
|                            |           |           |       |           |       |           |           |       |           |       |
|                            |           |           |       |           |       |           |           |       |           |       |
| Method of answering N(%):  |           |           | 0.812 |           | 0.406 |           |           | 0.191 |           | 0.478 |
| Electronic by mail         | 241 (84%) | 288 (85%) |       | 208 (87%) |       | 221 (89%) | 290 (85%) |       | 280 (87%) |       |
| Paper and pencil           | 45 (16%)  | 51 (15%)  |       | 30 (13%)  |       | 28 (11%)  | 51 (15%)  |       | 42 (13%)  |       |
|                            |           |           |       |           |       |           |           |       |           |       |
| Alcohol units pr. week     |           |           | 0.871 |           | 0.872 |           |           | 0.859 |           | 0.847 |
| No                         | 58 (20%)  | 70 (21%)  |       | 59 (20%)  |       | 52 (21%)  | 68 (20%)  |       | 67 (21%)  |       |
| 1-7                        | 153 (53%) | 188 (55%) |       | 160 (54%) |       | 142 (57%) | 188 (55%) |       | 173 (54%) |       |
| 8-14                       | 51 (18%)  | 52 (15%)  |       | 44 (15%)  |       | 36 (14%)  | 58 (17%)  |       | 51 (16%)  |       |
| >14                        | 24 (8%)   | 29 (9%)   |       | 32 (11%)  |       | 19 (8%)   | 27 (8%)   |       | 31 (10%)  |       |
|                            |           |           |       |           |       |           |           |       |           |       |
| Smoking:                   |           |           | 0.149 |           | 0.953 |           |           | 0.635 |           | 0.573 |
| Current                    | 25 (9%)   | 38 (11%)  |       | 27 (11%)  |       | 20 (8%)   | 34 (10%)  |       | 37 (12%)  |       |
| Former                     | 150 (53%) | 152 (45%) |       | 104 (44%) |       | 131 (53%) | 169 (50%) |       | 147 (46%) |       |
| Never                      | 110 (39%) | 148 (44%) |       | 107 (45%) |       | 97 (39%)  | 137 (40%) |       | 137 (43%) |       |

Table S2 Quality of life data of all 6 time periods

| All patients included in the COVID-19 cohort |                             |                             |                             |                         |                         |                                          |                                          |                                          |                         |                         |
|----------------------------------------------|-----------------------------|-----------------------------|-----------------------------|-------------------------|-------------------------|------------------------------------------|------------------------------------------|------------------------------------------|-------------------------|-------------------------|
|                                              |                             |                             | First wave                  |                         |                         | Second wave                              |                                          |                                          |                         |                         |
|                                              | April-June<br>2018<br>Q=426 | April-June<br>2019<br>Q=472 | April-June<br>2020<br>Q=389 | P-value<br>2018 vs 2019 | P-value<br>2019 vs 2020 | November 2018<br>– January 2019<br>Q=476 | November 2019<br>– January 2020<br>Q=475 | November 2020<br>– January 2021<br>Q=349 | P-value<br>2018 vs 2019 | P-value<br>2019 vs 2020 |
| <b>EORTC-QLQ-C30 Mean (SD)</b>               |                             |                             |                             |                         |                         |                                          |                                          |                                          |                         |                         |
| Global health status QoL                     | 58.70 (22.55)               | 61.04 (22.83)               | 60.37 (22.56)               | 0.611                   | 0.921                   | 60.42 (22.81)                            | 60.52 (22.81)                            | 59.83 (21.46)                            | 0.867                   | 0.673                   |
| <b>Functional scales</b>                     |                             |                             |                             |                         |                         |                                          |                                          |                                          |                         |                         |
| Physical functioning                         | 70.63 (20.75)               | 72.26 (20.48)               | 72.47 (21.54)               | 0.187                   | 0.067                   | 72.90 (21.44)                            | 70.11 (22.65)                            | 70.81 (22.44)                            | 0.114                   | 0.670                   |
| Role functioning                             | 56.63 (30.97)               | 60.32 (28.93)               | 61.44 (31.18)               | 0.805                   | 0.087                   | 62.18 (29.97)                            | 58.42 (32.54)                            | 60.32 (30.90)                            | 0.059                   | 0.300                   |
| Emotional functioning                        | 78.26 (21.03)               | 81.82 (18.90)               | 79.91 (19.84)               | 0.583                   | 0.255                   | 81.99 (19.52)                            | 79.47 (20.80)                            | 80.21 (17.92)                            | 0.367                   | 0.802                   |
| Cognitive functioning                        | 84.02 (21.80)               | 82.91 (20.44)               | 84.36 (19.53)               | 0.171                   | 0.217                   | 83.54 (21.19)                            | 81.33 (22.63)                            | 82.66 (20.17)                            | 0.658                   | 0.424                   |
| Social functioning                           | 75.32 (26.57)               | 76.79 (24.65)               | 75.28 (28.05)               | 0.181                   | 0.519                   | 78.84 (24.47)                            | 76.79 (26.22)                            | 73.97 (27.30)                            | 0.229                   | 0.071                   |
| <b>Symptom scales</b>                        |                             |                             |                             |                         |                         |                                          |                                          |                                          |                         |                         |
| Fatigue                                      | 42.42 (25.36)               | 40.19 (24.31)               | 38.43 (24.82)               | 0.208                   | 0.030                   | 39.96 (26.00)                            | 40.05 (25.48)                            | 39.80 (23.51)                            | 0.762                   | 0.768                   |
| Nausea and vomiting                          | 7.63 (14.19)                | 6.75 (14.43)                | 6.86 (13.44)                | 0.231                   | 0.966                   | 8.40 (16.45)                             | 7.24 (14.55)                             | 7.14 (15.53)                             | 0.492                   | 0.802                   |
| Pain                                         | 32.45 (29.99)               | 27.49 (26.76)               | 29.01 (27.69)               | 0.321                   | 0.356                   | 26.75 (28.83)                            | 31.54 (29.66)                            | 30.56 (27.46)                            | 0.005                   | 0.443                   |
| Dyspnoea                                     | 26.63 (27.88)               | 21.39 (26.05)               | 19.19 (24.35)               | 0.047                   | 0.055                   | 22.39 (25.84)                            | 22.46 (27.03)                            | 23.88 (27.04)                            | 0.406                   | 0.431                   |
| Insomnia                                     | 25.70 (27.86)               | 26.87 (28.47)               | 24.68 (25.48)               | 0.182                   | 0.899                   | 27.24 (27.91)                            | 27.50 (29.34)                            | 29.61 (29.50)                            | 0.203                   | 0.605                   |
| Appetite loss                                | 18.93 (26.16)               | 15.82 (26.36)               | 18.81 (28.22)               | 0.891                   | 0.265                   | 18.84 (26.97)                            | 16.60 (25.30)                            | 15.13 (24.81)                            | 0.600                   | 0.555                   |
| Constipation                                 | 17.71 (26.50)               | 14.57 (23.03)               | 15.38 (24.70)               | 0.773                   | 0.689                   | 15.83 (25.72)                            | 18.46 (27.05)                            | 18.30 (24.81)                            | 0.229                   | 0.498                   |
| Diarrhoea                                    | 14.11 (24.32)               | 15.31 (24.79)               | 12.17 (21.81)               | 0.117                   | 0.016                   | 17.37 (27.14)                            | 14.76 (23.52)                            | 15.80 (26.22)                            | 0.261                   | 0.742                   |
| Financial difficulties                       | 8.60 (20.34)                | 6.18 (17.53)                | 7.03 (17.64)                | 0.024                   | 0.790                   | 6.54 (18.57)                             | 8.39 (19.23)                             | 7.28 (18.72)                             | 0.930                   | 0.276                   |
| <b>SF 12v2 Mean (SD)</b>                     |                             |                             |                             |                         |                         |                                          |                                          |                                          |                         |                         |
| Mental health                                | 44.46 (10.54)               | 46.54 (10.01)               | 43.95 (10.96)               | 0.655                   | 0.007                   | 46.75 (10.95)                            | 44.68 (11.40)                            | 43.49 (11.29)                            | 0.006                   | 0.378                   |
| Physical health                              | 40.11 (10.73)               | 41.50 (9.87)                | 41.80 (10.27)               | 0.718                   | 0.691                   | 41.69 (11.05)                            | 41.09 (10.64)                            | 42.83 (10.10)                            | 0.351                   | 0.059                   |
| <b>EORTC CIPN20 Mean (SD)</b>                |                             |                             |                             |                         |                         |                                          |                                          |                                          |                         |                         |
| Autonomic scale                              | 22.03 (19.99)               | 21.59 (18.82)               | 22.22 (19.56)               | 0.696                   | 0.899                   | 20.50 (19.34)                            | 21.62 (20.38)                            | 24.17 (19.98)                            | 0.684                   | 0.515                   |
| Motor scale                                  | 12.79 (15.58)               | 13.60 (13.77)               | 12.27 (12.59)               | 0.148                   | 0.326                   | 11.51 (12.57)                            | 12.18 (13.09)                            | 13.48 (14.45)                            | 0.362                   | 0.142                   |
| Sensory scale                                | 13.17 (16.97)               | 13.63 (15.28)               | 13.48 (15.07)               | 0.300                   | 0.919                   | 12.24 (15.24)                            | 12.13 (15.27)                            | 14.11 (14.54)                            | 0.762                   | 0.215                   |
| Sum score                                    | 13.50 (14.41)               | 14.22 (12.92)               | 13.52 (12.50)               | 0.119                   | 0.570                   | 12.46 (12.65)                            | 12.69 (12.90)                            | 14.49 (12.71)                            | 0.825                   | 0.149                   |
| <b>EORTC QLQ-MY20 Mean (SD)</b>              |                             |                             |                             |                         |                         |                                          |                                          |                                          |                         |                         |
| Future perspectives                          | 61.78 (24.19)               | 66.14 (22.72)               | 66.48 (23.80)               | 0.946                   | 0.476                   | 66.20 (25.07)                            | 64.22 (25.78)                            | 61.78 (25.81)                            | 0.547                   | 0.272                   |
| Body image                                   | 76.45 (29.38)               | 76.71 (27.93)               | 76.95 (28.96)               | 0.382                   | 0.876                   | 77.31 (27.56)                            | 76.78 (28.76)                            | 75.70 (26.57)                            | 0.970                   | 0.551                   |
| Disease symptoms                             | 24.02 (20.34)               | 21.67 (18.77)               | 21.45 (17.89)               | 0.874                   | 0.947                   | 20.29 (19.80)                            | 25.22 (18.94)                            | 23.43 (18.80)                            | 0.005                   | 0.681                   |



|                          |               |               |               |       |       |               |               |               |       |       |
|--------------------------|---------------|---------------|---------------|-------|-------|---------------|---------------|---------------|-------|-------|
| Future perspectives      | 58.56 (28.04) | 67.92 (24.62) | 70.19 (22.42) | 0.287 | 0.616 | 65.40 (25.16) | 68.28 (24.05) | 64.86 (28.87) | 0.644 | 0.222 |
| Body image               | 76.58 (33.21) | 73.58 (30.91) | 79.67 (27.77) | 0.437 | 0.303 | 71.97 (28.70) | 77.42 (30.64) | 77.48 (28.39) | 0.349 | 0.823 |
| Disease symptoms         | 24.50 (19.89) | 21.05 (17.71) | 20.73 (17.34) | 0.833 | 0.647 | 23.21 (21.98) | 25.22 (18.82) | 24.18 (20.28) | 0.214 | 0.923 |
| Side effect of treatment | 17.99 (12.60) | 18.84 (14.92) | 17.49 (14.03) | 0.498 | 0.237 | 18.20 (14.47) | 16.44 (11.72) | 18.97 (16.77) | 0.755 | 0.159 |

| COVID-19 cohort patients under 65 years |                             |                             |                              |                         |                         |                                          |                                          |                                          |                         |                         |
|-----------------------------------------|-----------------------------|-----------------------------|------------------------------|-------------------------|-------------------------|------------------------------------------|------------------------------------------|------------------------------------------|-------------------------|-------------------------|
|                                         | First wave                  |                             |                              |                         |                         | Second wave                              |                                          |                                          |                         |                         |
|                                         | April-June<br>2018<br>Q=140 | April-June<br>2019<br>Q=157 | April-June<br>2020<br>Q= 128 | P-value<br>2018 vs 2019 | P-value<br>2019 vs 2020 | November 2018<br>– January 2019<br>Q=152 | November 2019<br>– January 2020<br>Q=154 | November 2020<br>– January 2021<br>Q=123 | P-value<br>2018 vs 2019 | P-value<br>2019 vs 2020 |
| <b>EORTC-QLQ-C30 Mean (SD)</b>          |                             |                             |                              |                         |                         |                                          |                                          |                                          |                         |                         |
| Global health status QoL                | 58.87 (21.61)               | 58.98 (24.57)               | 62.07 (23.04)                | 0.327                   | 0.045                   | 58.17 (22.11)                            | 58.88 (22.71)                            | 60.00 (21.86)                            | 0.374                   | 0.567                   |
| <b>Functional scales</b>                |                             |                             |                              |                         |                         |                                          |                                          |                                          |                         |                         |
| Physical functioning                    | 74.58 (19.32)               | 72.27 (21.78)               | 77.34 (19.91)                | 0.025                   | 0.001                   | 72.50 (20.51)                            | 73.98 (20.86)                            | 72.38 (24.15)                            | 0.948                   | 0.693                   |
| Role functioning                        | 55.95 (31.61)               | 54.67 (30.65)               | 63.02 (31.30)                | 0.332                   | <0.001                  | 56.80 (32.06)                            | 57.25 (33.27)                            | 59.62 (32.36)                            | 0.679                   | 0.197                   |
| Emotional functioning                   | 77.50 (22.48)               | 78.37 (21.16)               | 78.39 (19.41)                | 0.206                   | 0.538                   | 79.95 (19.98)                            | 75.05 (21.51)                            | 80.69 (15.62)                            | 0.534                   | 0.215                   |
| Cognitive functioning                   | 82.86 (21.43)               | 79.94 (23.32)               | 83.20 (19.34)                | 0.026                   | 0.064                   | 83.22 (21.74)                            | 79.87 (24.15)                            | 81.17 (20.57)                            | 0.493                   | 0.530                   |
| Social functioning                      | 75.00 (24.44)               | 72.12 (26.72)               | 70.18 (32.11)                | 0.070                   | 0.909                   | 75.77 (26.43)                            | 75.00 (27.23)                            | 68.70 (29.38)                            | 0.752                   | 0.112                   |
| <b>Symptom scales</b>                   |                             |                             |                              |                         |                         |                                          |                                          |                                          |                         |                         |
| Fatigue                                 | 41.55 (23.82)               | 43.17 (28.52)               | 37.15 (26.51)                | 0.153                   | <0.001                  | 42.73 (26.73)                            | 41.27 (25.65)                            | 39.11 (23.04)                            | 0.398                   | 0.309                   |
| Nausea and vomiting                     | 9.05 (15.27)                | 9.13 (17.14)                | 8.98 (15.78)                 | 0.160                   | 0.491                   | 10.86 (18.32)                            | 9.85 (17.42)                             | 8.94 (16.57)                             | 0.733                   | 0.911                   |
| Pain                                    | 31.79 (28.62)               | 31.53 (26.46)               | 26.04 (24.90)                | 0.099                   | 0.009                   | 28.73 (28.72)                            | 31.93 (28.39)                            | 31.84 (28.23)                            | 0.086                   | 0.351                   |
| Dyspnoea                                | 23.98 (26.02)               | 22.51 (25.66)               | 14.84 (19.08)                | 0.906                   | 0.004                   | 21.93 (25.19)                            | 19.26 (24.63)                            | 21.14 (25.35)                            | 0.226                   | 0.778                   |
| Insomnia                                | 28.10 (25.06)               | 32.70 (30.54)               | 22.92 (23.57)                | 0.007                   | 0.002                   | 29.82 (29.00)                            | 31.39 (29.08)                            | 31.98 (31.77)                            | 0.825                   | 0.979                   |
| Appetite loss                           | 16.43 (24.16)               | 15.92 (27.11)               | 18.23 (28.63)                | 0.445                   | 0.963                   | 20.39 (28.72)                            | 15.37 (23.84)                            | 16.26 (26.44)                            | 0.828                   | 0.849                   |
| Constipation                            | 17.62 (27.83)               | 12.31 (22.74)               | 10.50 (20.45)                | 0.576                   | 0.615                   | 10.96 (22.95)                            | 16.02 (25.05)                            | 16.80 (25.02)                            | 0.265                   | 0.822                   |
| Diarrhoea                               | 14.73 (23.14)               | 17.62 (26.57)               | 13.80 (24.93)                | 0.112                   | 0.018                   | 16.45 (25.73)                            | 15.80 (23.55)                            | 16.53 (25.38)                            | 0.529                   | 0.744                   |
| Financial difficulties                  | 14.05 (25.31)               | 11.54 (24.73)               | 13.54 (24.55)                | 0.200                   | 0.644                   | 13.25 (26.96)                            | 14.94 (25.58)                            | 10.93 (23.25)                            | 0.742                   | 0.125                   |
| <b>SF 12v2 Mean (SD)</b>                |                             |                             |                              |                         |                         |                                          |                                          |                                          |                         |                         |
| Mental health                           | 44.91 (10.18)               | 45.09 (9.87)                | 43.84 (11.12)                | 0.427                   | 0.254                   | 44.91 (9.43)                             | 44.63 (11.15)                            | 42.24 (11.14)                            | 0.654                   | 0.059                   |
| Physical health                         | 40.74 (10.67)               | 40.69 (10.46)               | 43.85 (8.46)                 | 0.791                   | 0.016                   | 41.57 (11.87)                            | 42.33 (10.40)                            | 46.02 (9.89)                             | 0.986                   | 0.004                   |
| <b>EORTC CIPN20 Mean (SD)</b>           |                             |                             |                              |                         |                         |                                          |                                          |                                          |                         |                         |
| Autonomic scale                         | 18.51 (17.64)               | 18.77 (18.01)               | 16.58 (15.70)                | 0.520                   | 0.135                   | 16.30 (17.94)                            | 17.00 (17.18)                            | 20.19 (17.98)                            | 0.447                   | 0.084                   |
| Motor scale                             | 9.40 (10.51)                | 11.63 (12.38)               | 7.89 (9.15)                  | 0.081                   | 0.001                   | 9.23 (9.79)                              | 8.99 (11.54)                             | 10.27 (10.40)                            | 0.969                   | 0.933                   |
| Sensory scale                           | 12.07 (14.94)               | 11.89 (14.37)               | 10.00 (12.31)                | 0.568                   | 0.185                   | 10.88 (14.16)                            | 10.45 (13.53)                            | 11.73 (13.27)                            | 0.952                   | 0.797                   |

|                                 |               |               |               |       |       |               |               |               |       |       |
|---------------------------------|---------------|---------------|---------------|-------|-------|---------------|---------------|---------------|-------|-------|
| Sum score                       | 11.22 (11.47) | 12.49 (12.13) | 9.60 (9.78)   | 0.136 | 0.014 | 10.47 (10.47) | 10.22 (11.76) | 11.92 (10.40) | 0.969 | 0.867 |
|                                 |               |               |               |       |       |               |               |               |       |       |
| <b>EORTC QLQ-MY20 Mean (SD)</b> |               |               |               |       |       |               |               |               |       |       |
| Future perspectives             | 61.75 (24.56) | 62.06 (22.34) | 65.43 (20.21) | 0.009 | 0.938 | 64.99 (25.70) | 62.00 (25.39) | 60.52 (25.24) | 0.296 | 0.887 |
| Body image                      | 72.68 (28.87) | 69.05 (29.66) | 73.46 (30.63) | 0.214 | 0.521 | 76.71 (27.04) | 71.19 (32.38) | 75.00 (26.40) | 0.103 | 0.632 |
| Disease symptoms                | 23.77 (19.38) | 23.90 (17.46) | 19.09 (14.05) | 0.315 | 0.025 | 17.94 (18.81) | 25.51 (19.50) | 21.93 (19.06) | 0.016 | 0.307 |
| Side effect of treatment        | 18.36 (14.17) | 19.96 (16.42) | 19.86 (14.54) | 0.050 | 0.508 | 17.79 (15.78) | 16.86 (14.98) | 16.30 (12.93) | 0.970 | 0.941 |
